# Supplementary material for: Multi-ancestry GWAS meta-analyses of lung cancer reveal susceptibility loci and elucidate smoking-independent genetic risk
Source: PubMed Central journal article supplement — Nat Commun. 2024 Oct 4;15:8629. doi: 10.1038/s41467-024-52129-4 (PMC11452618; doi:10.1038/s41467-024-52129-4), 2024-10-04
Supplement: 41467_2024_52129_MOESM1_ESM.pdf [file 41467_2024_52129_MOESM1_ESM.pdf]

## Supplementary information

### **Multi-ancestry GWAS meta-analyses of lung cancer reveal novel susceptibility loci and elucidate smoking-independent genetic risk**

Bryan R. Gorman<sup>1,2</sup>, Sun-Gou Ji<sup>1,15</sup>, Michael Francis<sup>1,2</sup>, Anoop K. Sendamarai<sup>1,16</sup>, Yunling Shi<sup>1</sup>, Poornima Devineni<sup>1</sup>, Uma Saxena<sup>1</sup>, Elizabeth Partan<sup>1</sup>, Andrea K. DeVito<sup>1,2</sup>, Jinyoung Byun<sup>3,4</sup>, Younghun Han<sup>3,4</sup>, Xiangjun Xiao<sup>3,4</sup>, Don D. Sin<sup>5</sup>, Wim Timens<sup>6,7</sup>, Jennifer Moser<sup>8</sup>, Sumitra Muralidhar<sup>8</sup>, Rachel Ramoni<sup>8</sup>, Rayjean J. Hung<sup>9</sup>, James D. McKay<sup>10</sup>, Yohan Bossé<sup>11</sup>, Ryan Sun<sup>12</sup>, Christopher I. Amos<sup>3,4,13</sup>, VA Million Veteran Program, Saiju Pyarajan<sup>1,14\*</sup>

<sup>1</sup>Center for Data and Computational Sciences (C-DACS), VA Boston Healthcare System, Boston, MA, USA; <sup>2</sup>Booz Allen Hamilton, McLean, VA, USA; <sup>3</sup>Institute for Clinical and Translational Research, Baylor College of Medicine, Houston, TX, USA; <sup>4</sup>Department of Medicine, Section of Epidemiology and Population Sciences, Baylor College of Medicine, Houston, TX, USA; <sup>5</sup>The University of British Columbia Centre for Heart Lung Innovation, St Paul's Hospital, Vancouver, British Columbia, Canada; <sup>6</sup>University Medical Centre Groningen, GRIAC (Groningen Research Institute for Asthma and COPD), University of Groningen, Groningen, Netherlands; <sup>7</sup>Department of Pathology & Medical Biology, University Medical Centre Groningen, University of Groningen, Groningen, Netherlands; <sup>8</sup>Office of Research and Development, Department of Veterans Affairs, Washington, DC, USA; <sup>9</sup>Lunenfeld-Tanenbaum Research Institute, Sinai Health System, University of Toronto, Toronto, Ontario, Canada; <sup>10</sup>Section of Genetics, International Agency for Research on Cancer, World Health Organization, Lyon, France; <sup>11</sup>Institut universitaire de cardiologie et de pneumologie de Québec, Department of Molecular Medicine, Laval University, Quebec City, Quebec, Canada; <sup>12</sup>Department of Biostatistics, University of Texas MD Anderson Cancer Center, Houston, TX, USA; <sup>13</sup>Dan L Duncan Comprehensive Cancer Center, Baylor College of Medicine, Houston, TX, USA; <sup>14</sup>Department of Medicine, Brigham and Women's Hospital, Harvard Medical School, Boston, MA, USA;

<sup>15</sup>Present address: Sun-Gou Ji, BridgeBio Pharma, Palo Alto, CA, USA;

<sup>16</sup>Present address: Carbone Cancer Center, University of Wisconsin, Madison, WI, USA.

\*e-mail: Saiju Pyarajan: [saiju.pyarajan@va.gov](mailto:saiju.pyarajan@va.gov)

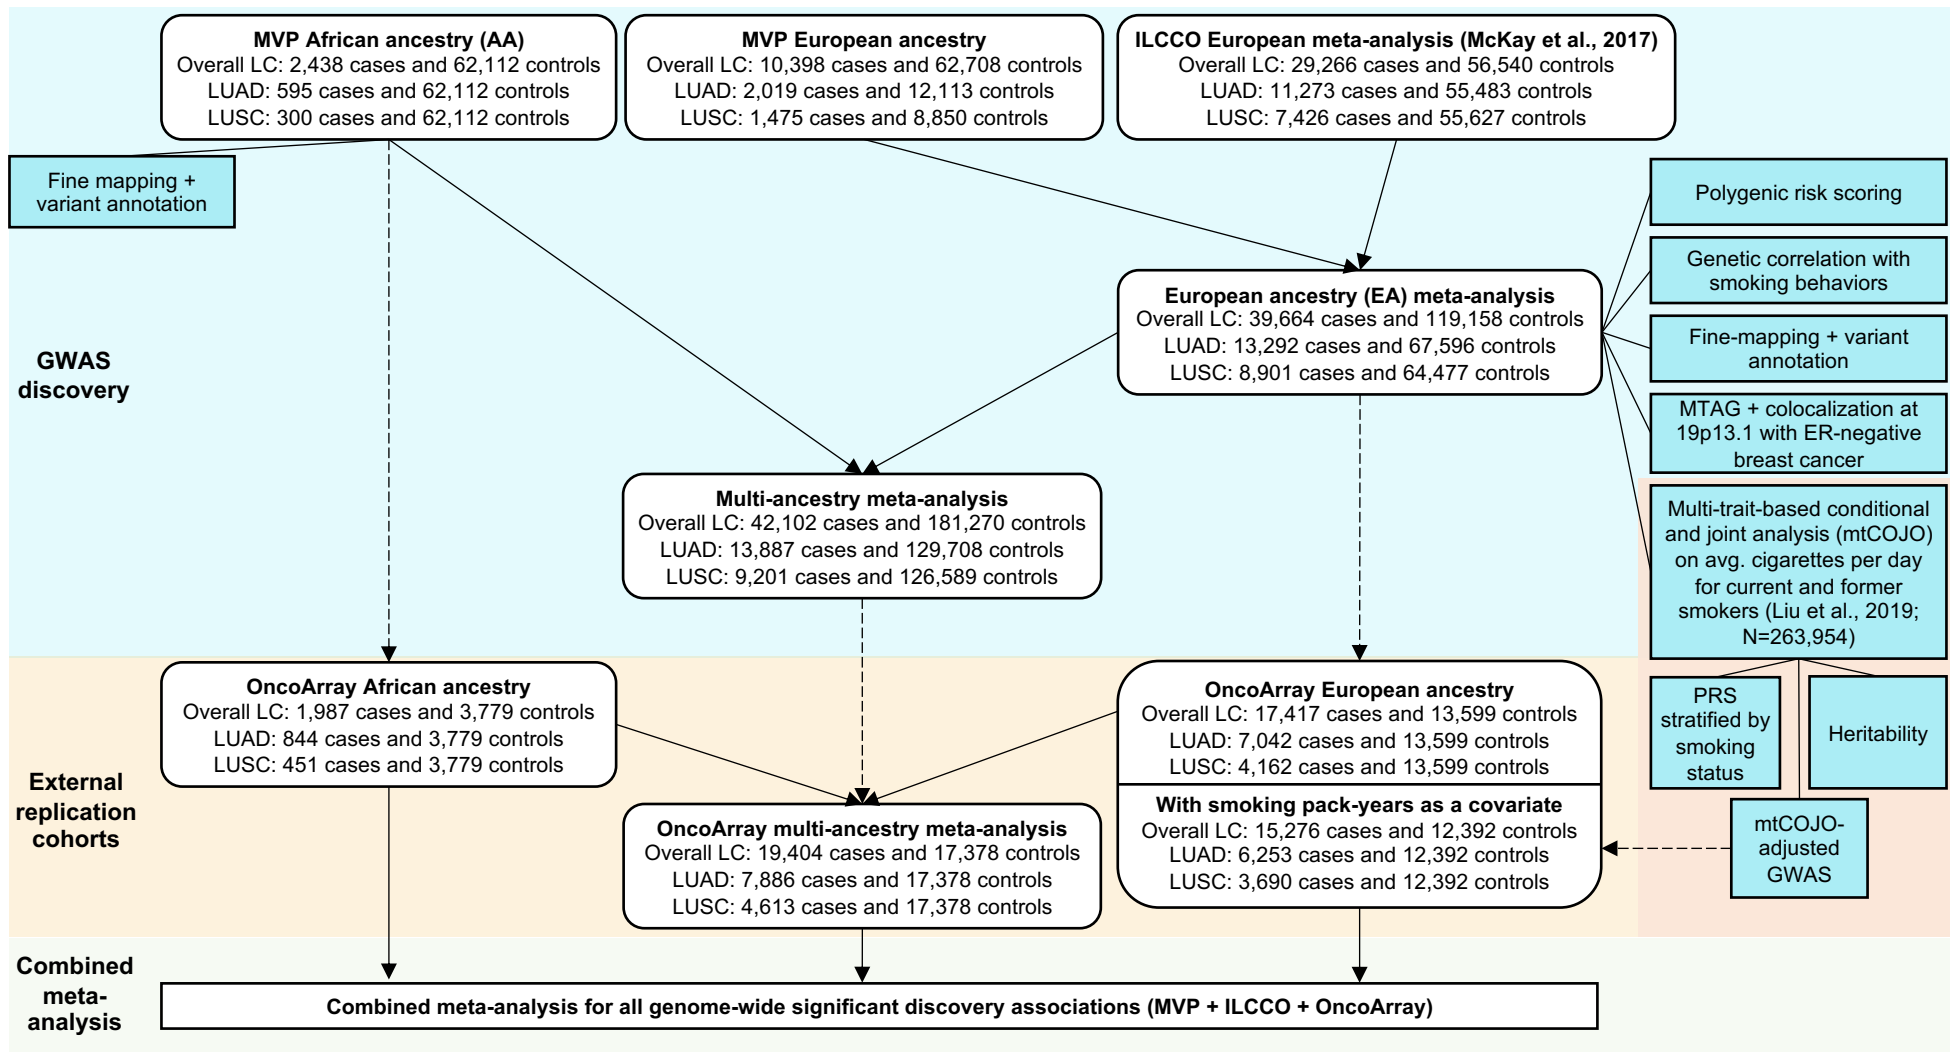

**Supplementary Fig. 1. Study overview.** Genome-wide association studies were performed in Million Veteran Program (MVP) European and African ancestry (AA) cohorts for overall lung cancer, adenocarcinoma, and squamous cell carcinoma. MVP and International Lung Cancer Consortium OncoArray (ILCCO)<sup>1</sup> European cohorts were meta-analyzed, and further meta-analyzed with AA for multi-ancestry meta-analysis. Multi-trait conditional meta-analysis was performed on EA using average cigarettes per day from Liu et al. (2019)<sup>2</sup>. Replication and combined meta-analysis was performed using external OncoArray Consortium Lung Study cohorts<sup>3</sup>.

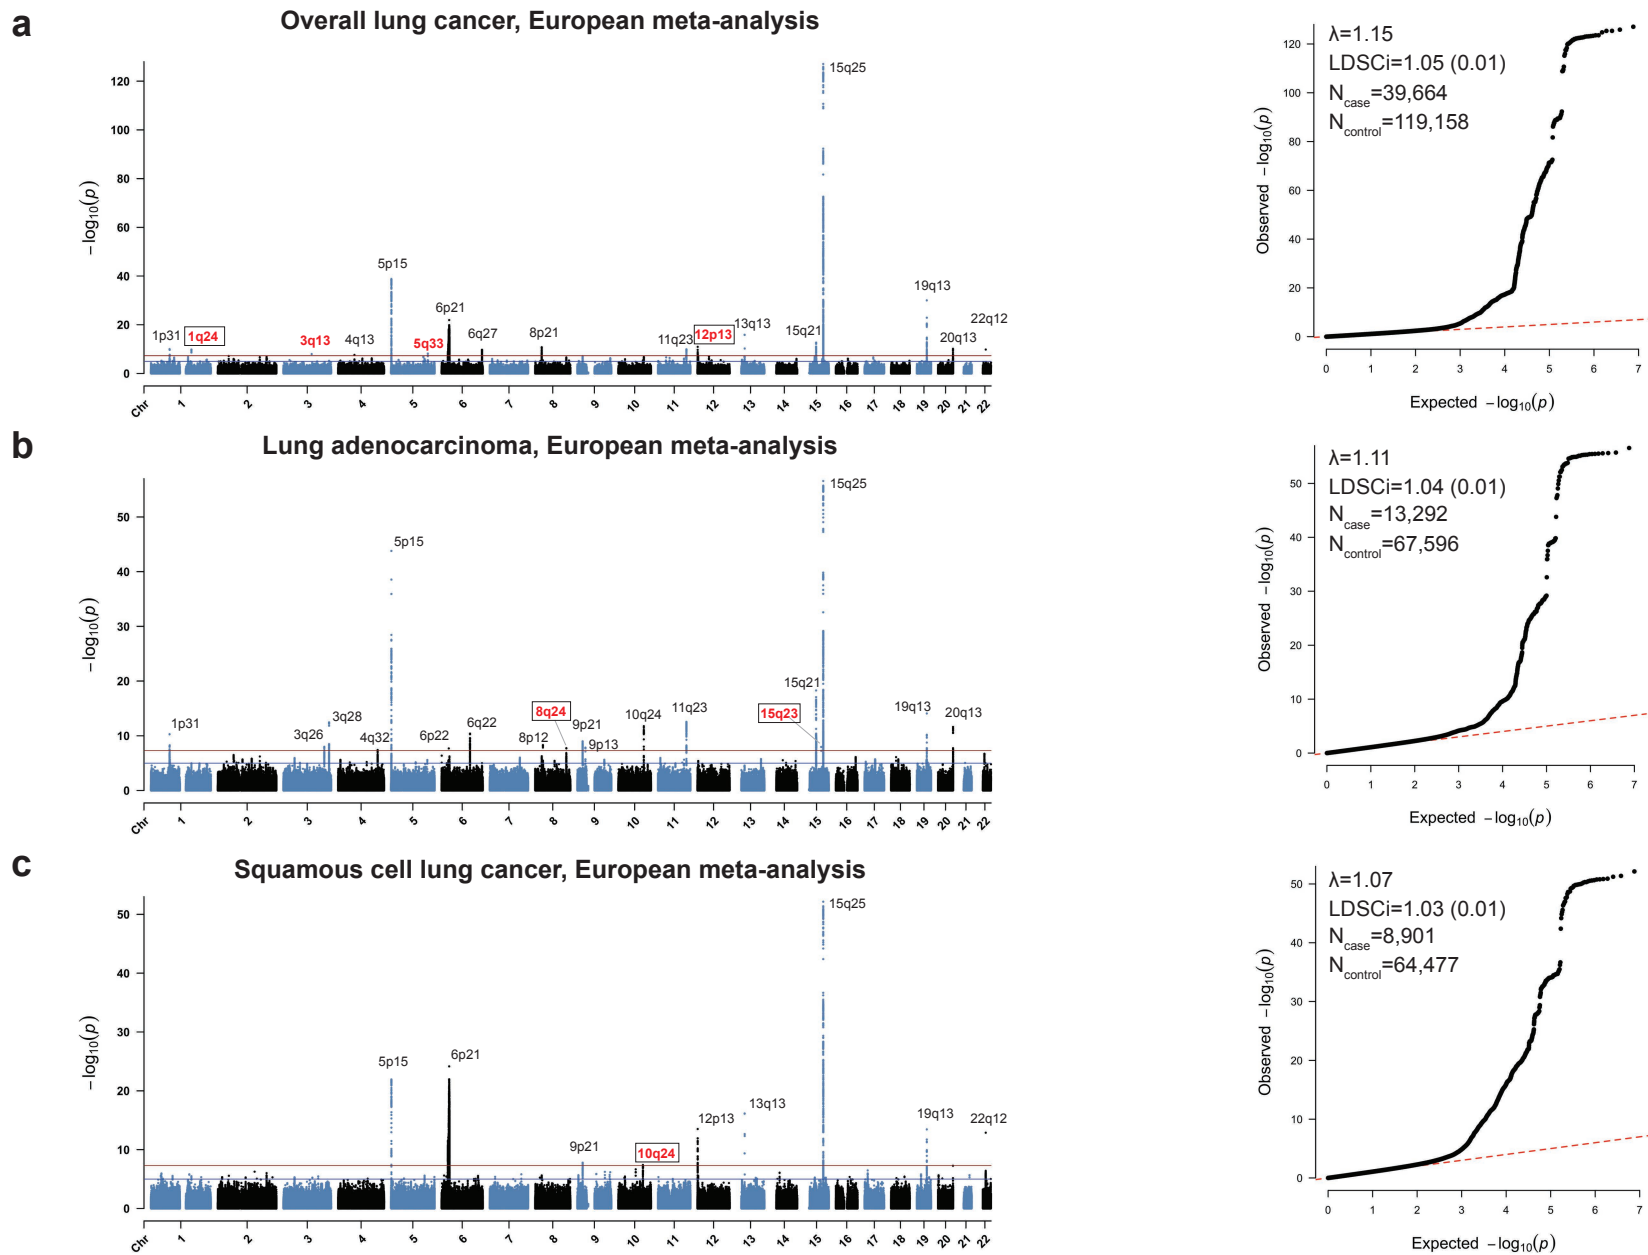

**Supplementary Fig. 2. Manhattan plots and quantile-quantile (QQ) plots for European meta-analyses.** Manhattan and QQ plots are shown for **a**) overall lung cancer; **b**) lung adenocarcinoma (LUAD); and **c**) squamous cell lung carcinoma (LUSC). Cytoband positions for significant loci are noted in each Manhattan plot; putatively novel loci identified in this study are in red; externally replicated novel loci are indicated by a box. Genomic control ( $\lambda$ ) values, LDSC intercepts, and sample sizes are inset in QQ plots.

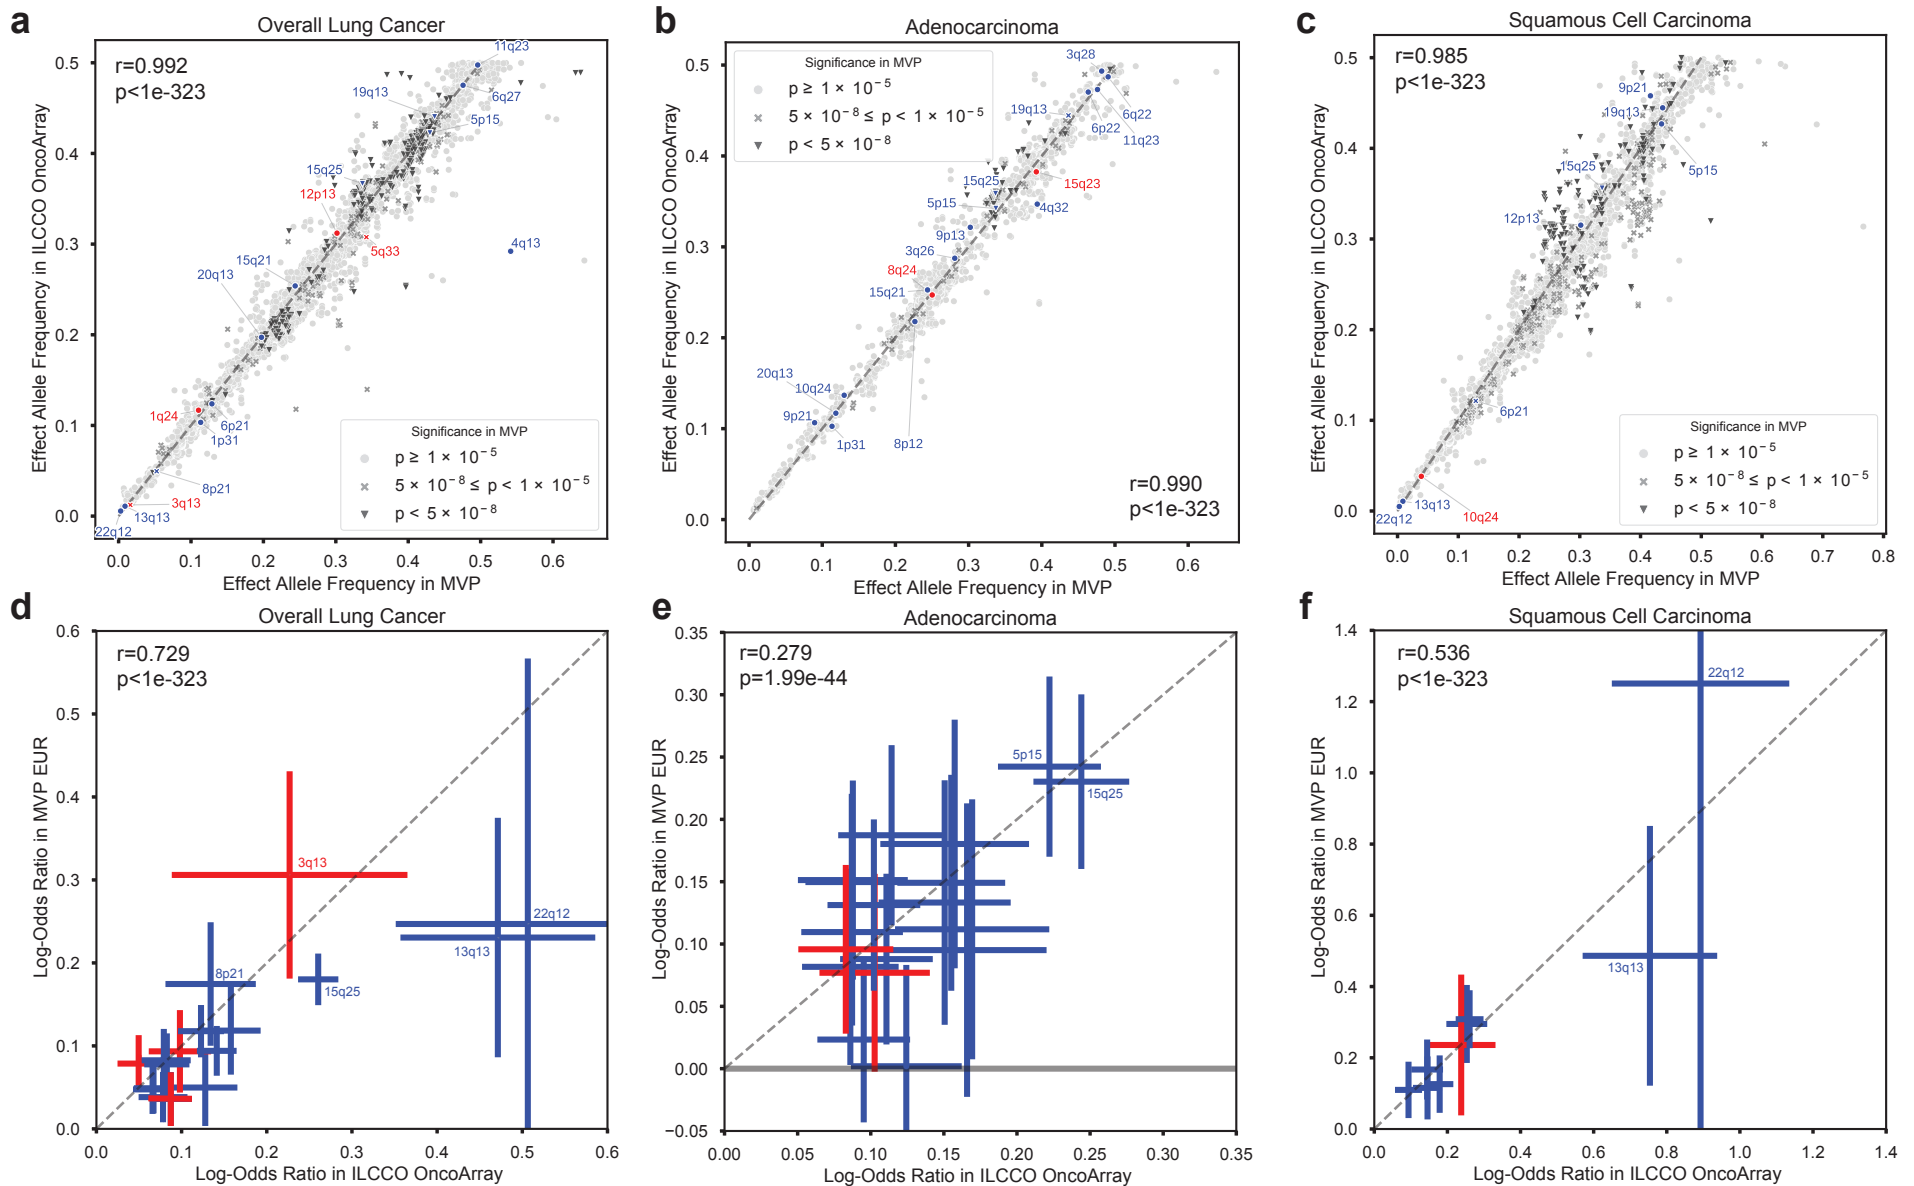

**Supplementary Fig. 3. Effect allele frequency concordance between International Lung Cancer Consortium OncoArray (ILCCO)<sup>1</sup> and Million Veteran Program European ancestry (EA) GWAS. (a-c)** Effect allele frequency concordance for all variants tested in both studies with  $P<1 \times 10^{-5}$  in ILCCO<sup>1</sup> for **a)** overall lung cancer, **b)** lung adenocarcinoma, and **c)** squamous cell lung carcinoma. Points are styled based on significance level in MVP. **(d-f)** Effect size concordance for genome-wide significant variants in **d)** overall lung cancer, **e)** lung adenocarcinoma, and **f)** squamous cell lung carcinoma. One-to-one concordance is shown as a dashed line. Index variants from the EA meta-analysis between ILCCO<sup>1</sup> and MVP are annotated by locus. Novel significant loci after meta-analysis are annotated in red. Error bars indicate 95% confidence interval.

S4a

Overall lung cancer, rs77045810 (XCL2; 1q24.2) : Novel and replicated

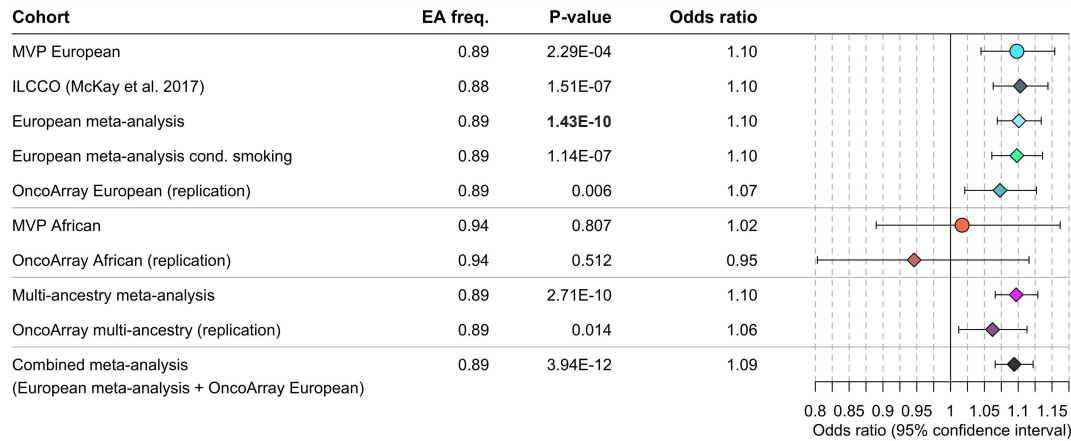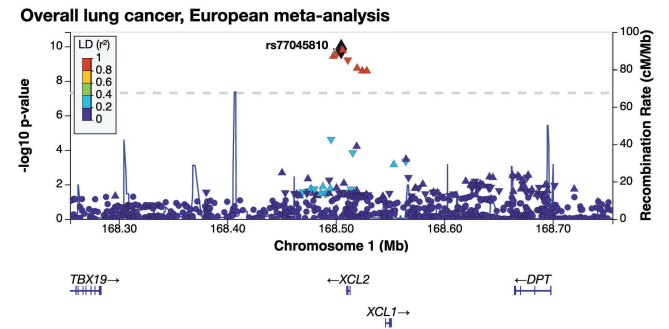

b

Overall lung cancer, rs144840030 (LSAMP; 3q13.31) : Putatively novel

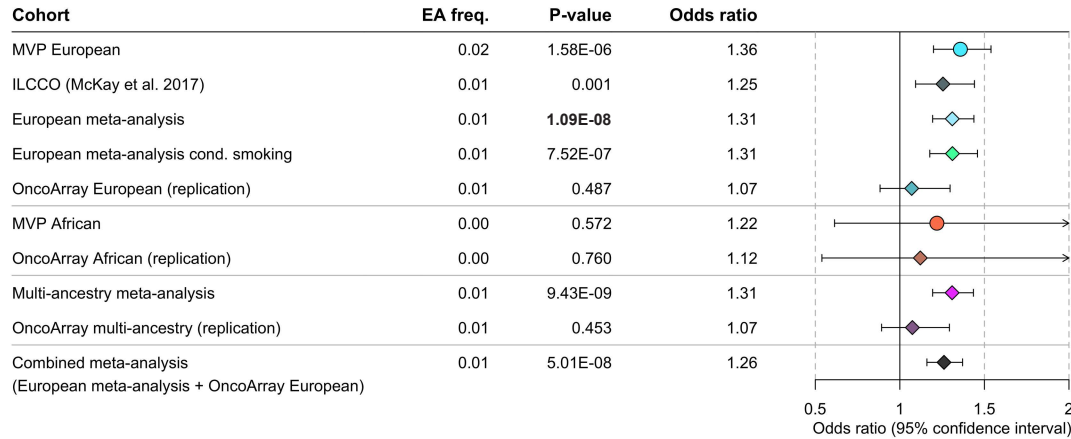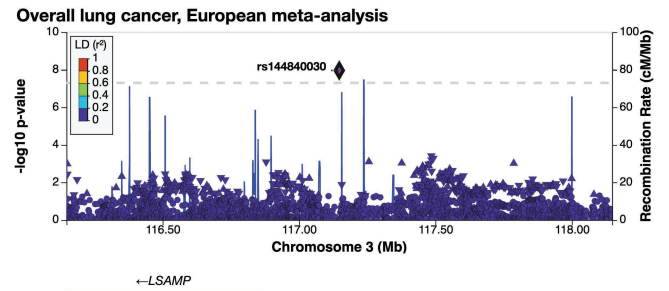

c

Overall lung cancer, rs62400619 (NMUR2; 5q33.1) : Putatively novel

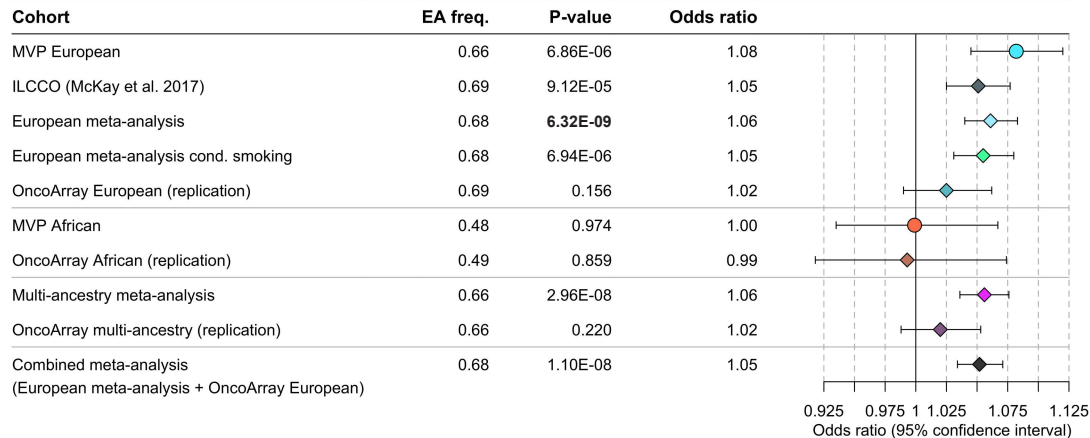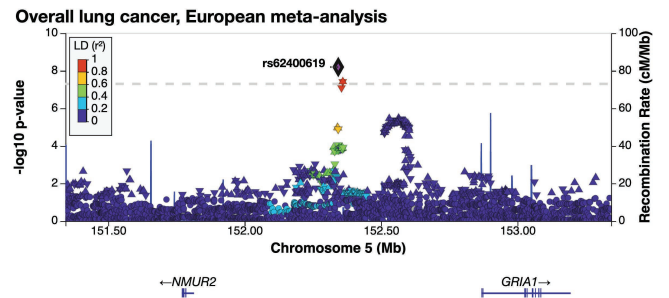

S4d

Overall lung cancer, rs9988980 (TULP3; 12p13.33) : Novel and replicated

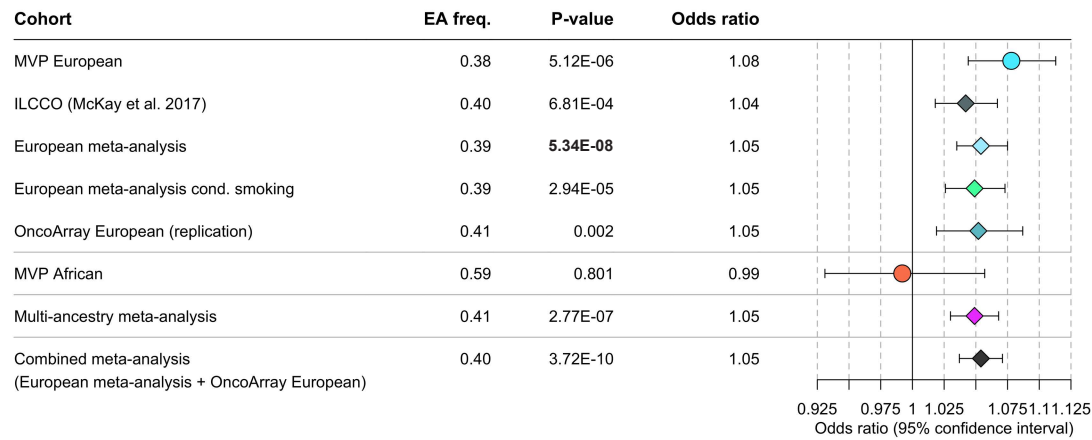

Overall lung cancer, European meta-analysis

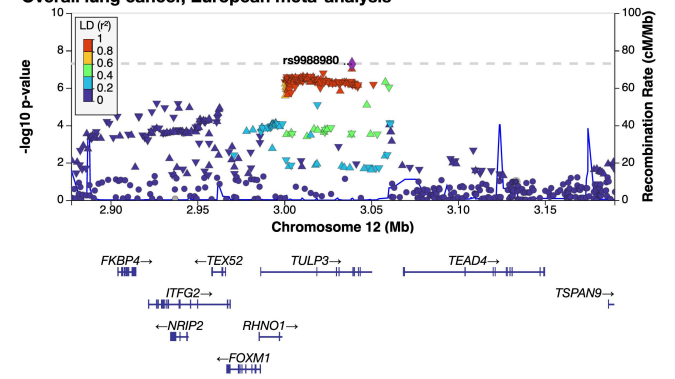

e

Lung adenocarcinoma, rs67824503 (MYC; 8q24.21) : Novel and replicated

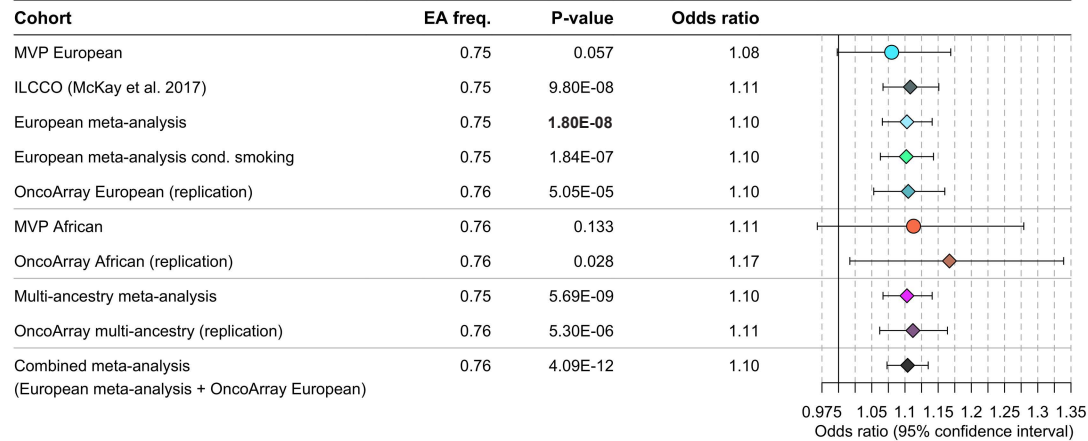

Adenocarcinoma, European meta-analysis

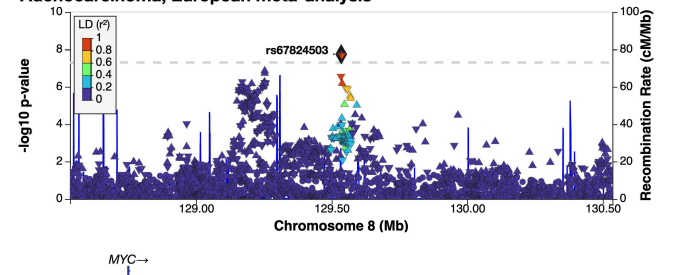

f

Lung adenocarcinoma, rs11855650 (TLE3; 15q23) : Novel and replicated

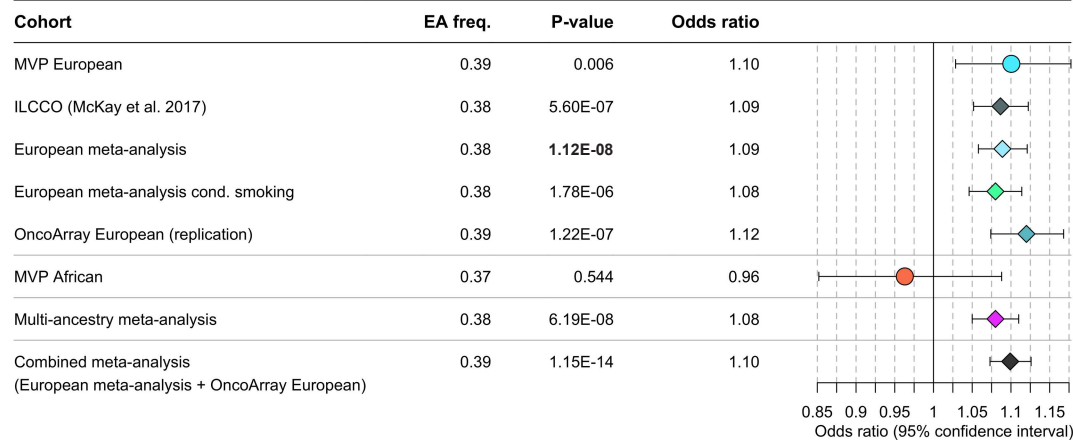

Adenocarcinoma, European meta-analysis

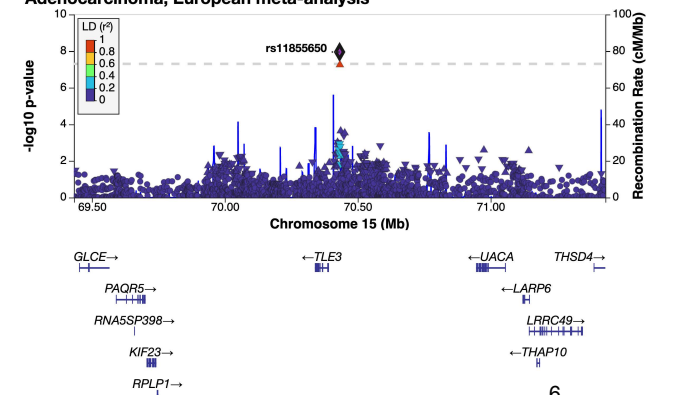

S4g

**Squamous cell lung carcinoma, rs36229791 (CHUK/BLOC1S2; 10q24.31) : Novel and replicated**

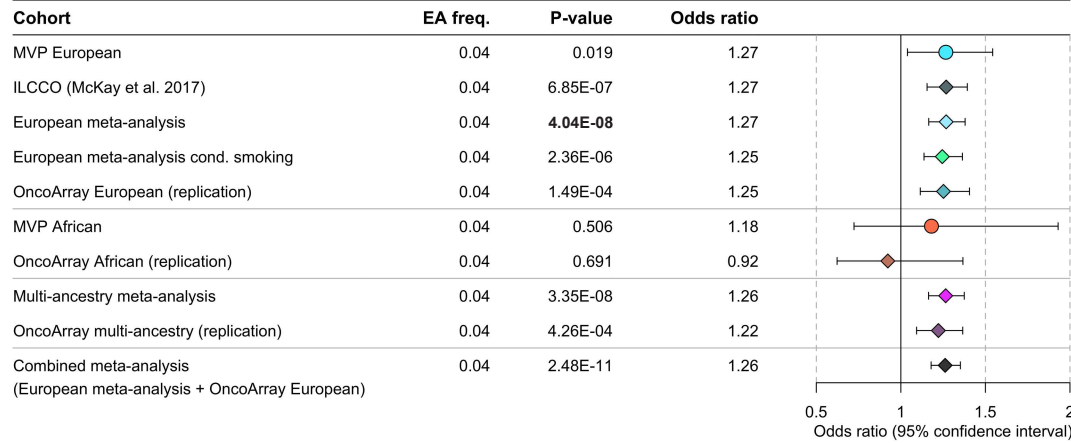

**Squamous cell carcinoma, European meta-analysis**

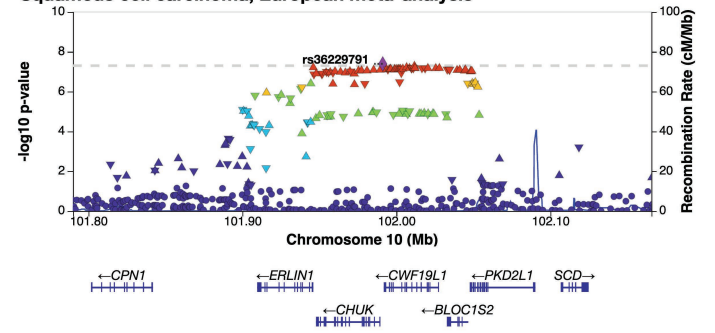

h

**Overall lung cancer, rs329122 (JADE2; 5q31.1) : Novel and replicated**

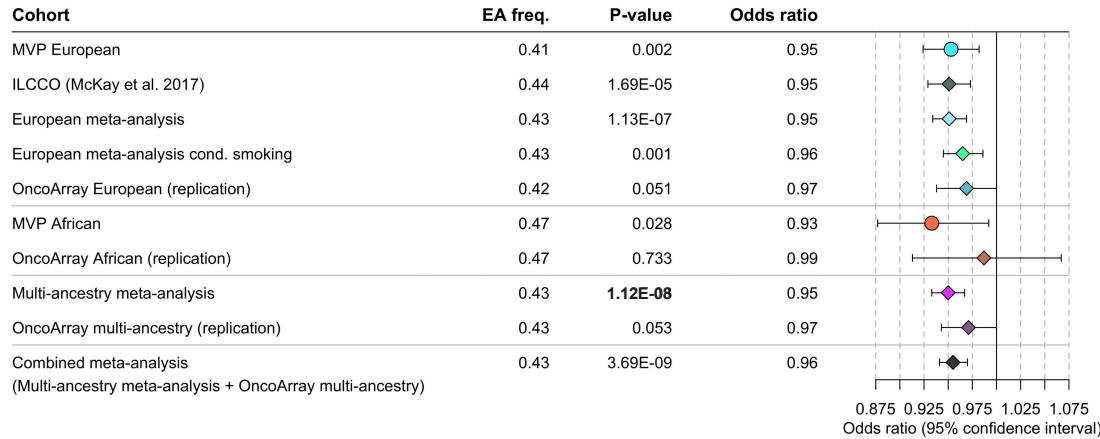

**Overall lung cancer, multi-ancestry meta-analysis**

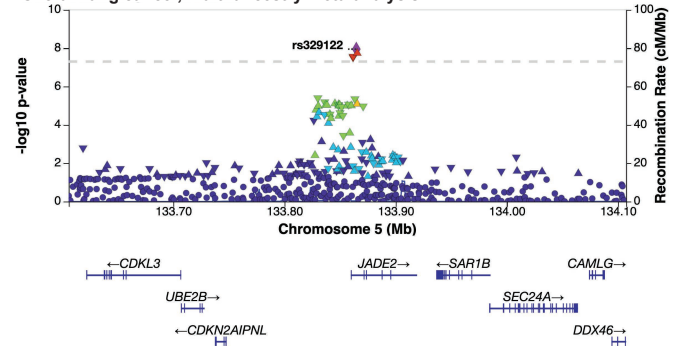

i

**Overall lung cancer, rs7300571 (RPAP3; 12q13.11) : Novel and replicated**

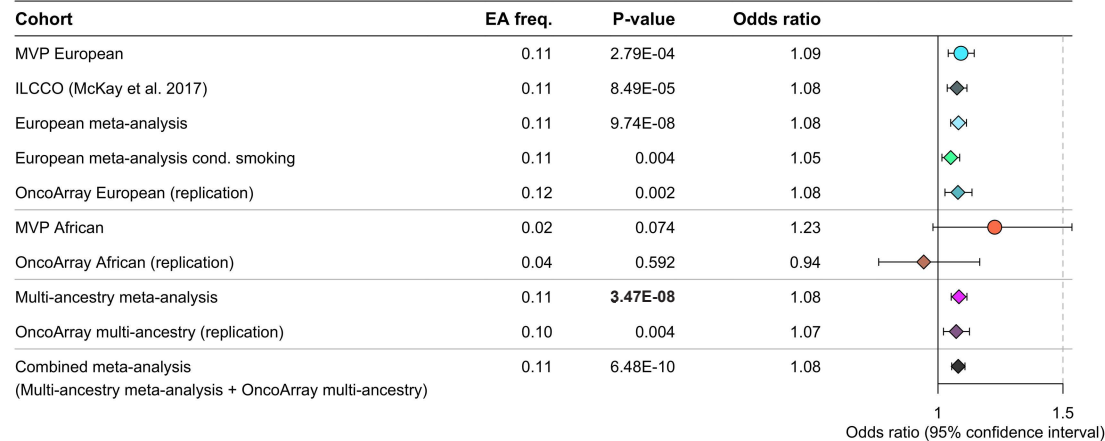

**Overall lung cancer, multi-ancestry meta-analysis**

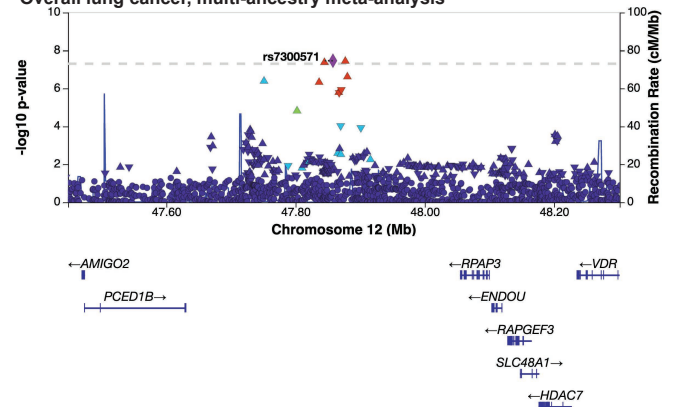

**Supplementary Fig. 4. Genome-wide significant novel lung cancer loci.** Forest plots (left) and regional Manhattan plots (right) for novel loci from European meta-analysis: **a)** *XCL2*, **b)** *LSAMP*, **c)** *NMUR2*, **d)** *TUPL3*, **e)** *MYC*, **f)** *TLE3*, and **g)** *BLOC1S2*; and from multi-ancestry meta-analysis: **h)** *JADE2*; **i)** *RPAP3*. Manhattan plot SNP data triangles pointing upwards or downwards correspond to positive or negative effect direction, based on the effect allele defined in summary statistics. Error bars indicate 95% confidence interval.



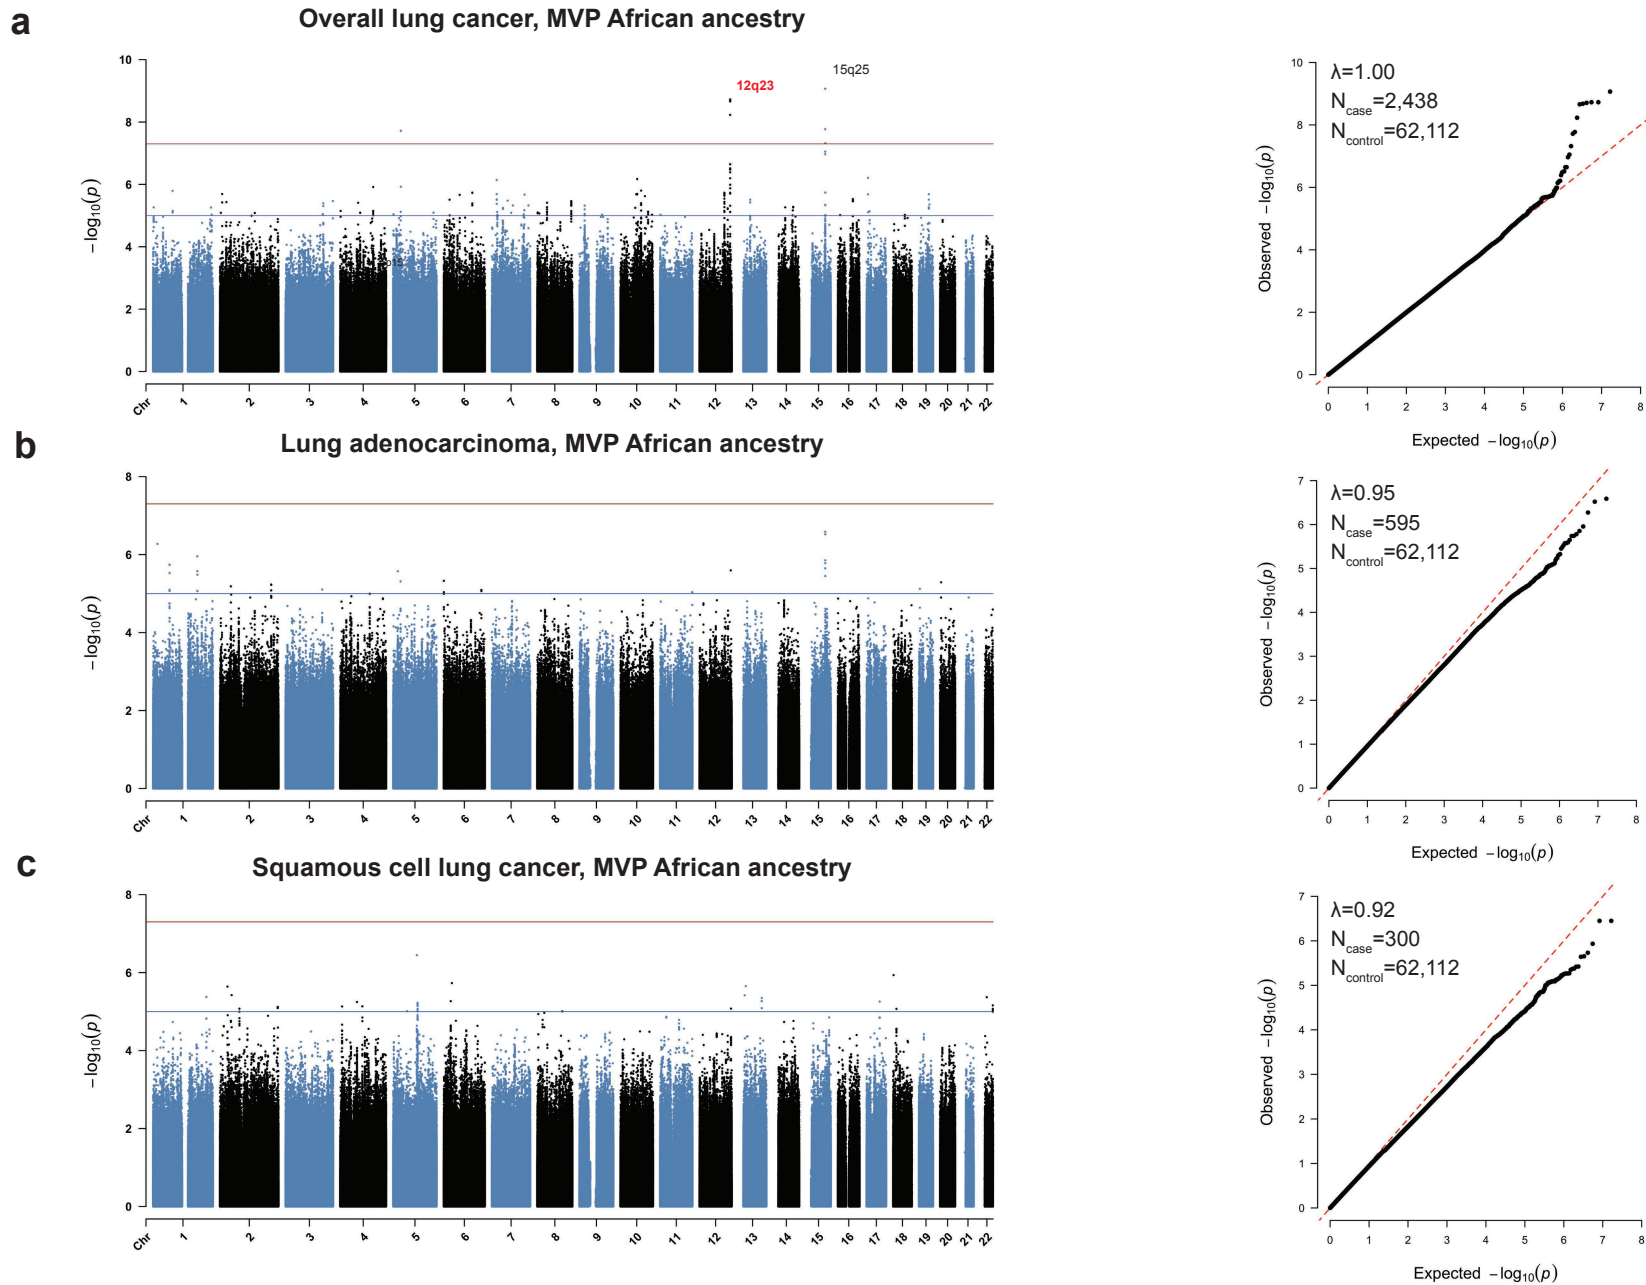

**Supplementary Fig. 5. Manhattan plots and quantile-quantile (QQ) plots for MVP African ancestry.** Manhattan and QQ plots are shown for **a**) African ancestry overall lung cancer; **b**) lung adenocarcinoma (LUAD); and **c**) squamous cell lung carcinoma (LUSC). Cytoband positions for significant loci are noted in each Manhattan plot; putatively novel loci identified in this study are in red. Genomic control ( $\lambda$ ) values and sample sizes are inset in QQ plots.

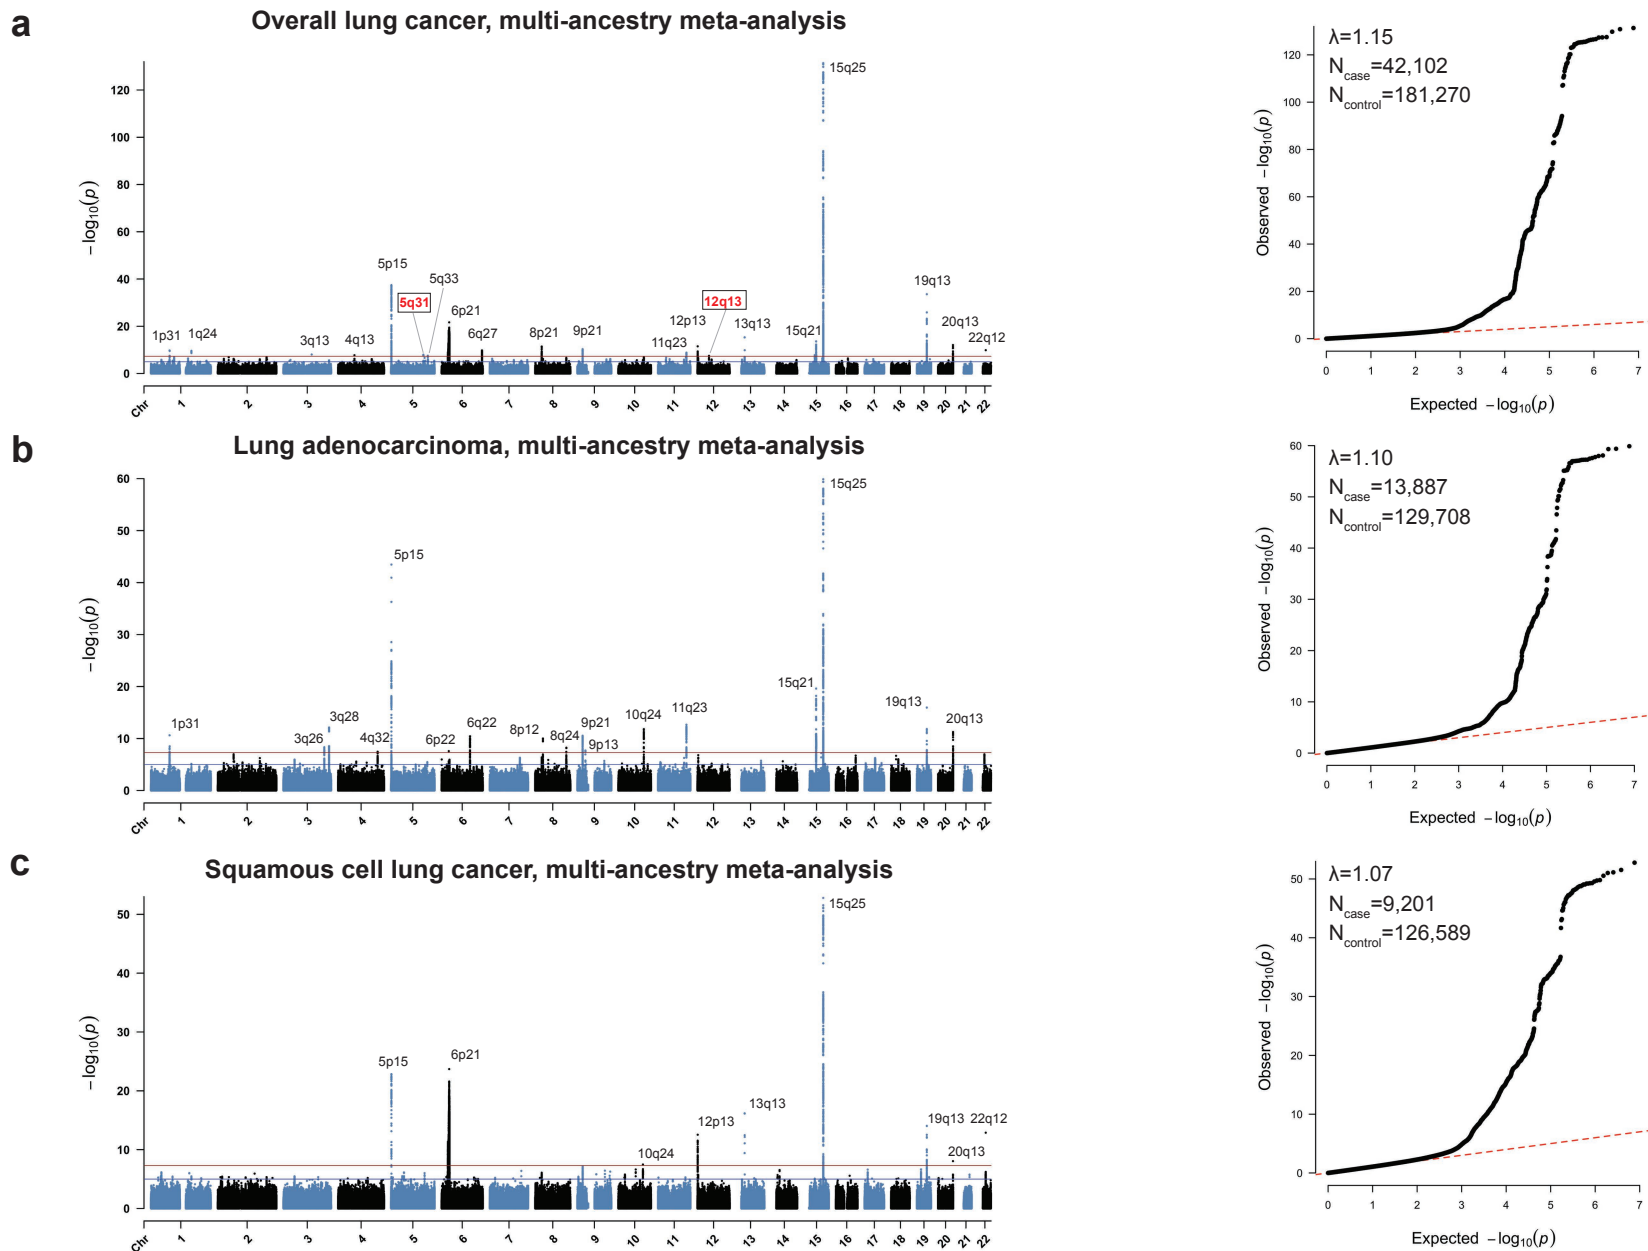

**Supplementary Fig. 6. Manhattan plots and quantile-quantile (QQ) plots for multi-ancestry meta-analyses.** Manhattan and QQ plots are shown for **a)** the multi-ancestry meta-analysis in overall lung cancer; **b)** lung adenocarcinoma (LUAD); and **c)** squamous cell lung carcinoma (LUSC). Cytoband positions for significant loci are noted in each Manhattan plot; novel loci not identified in the European meta-analysis are in red; externally replicated novel loci are indicated by a box. Genomic control ( $\lambda$ ) values and sample sizes are inset in QQ plots.

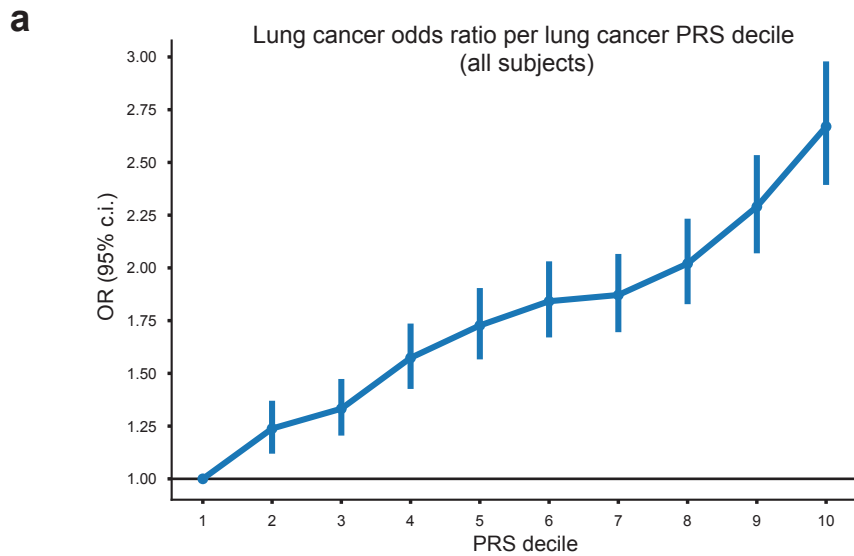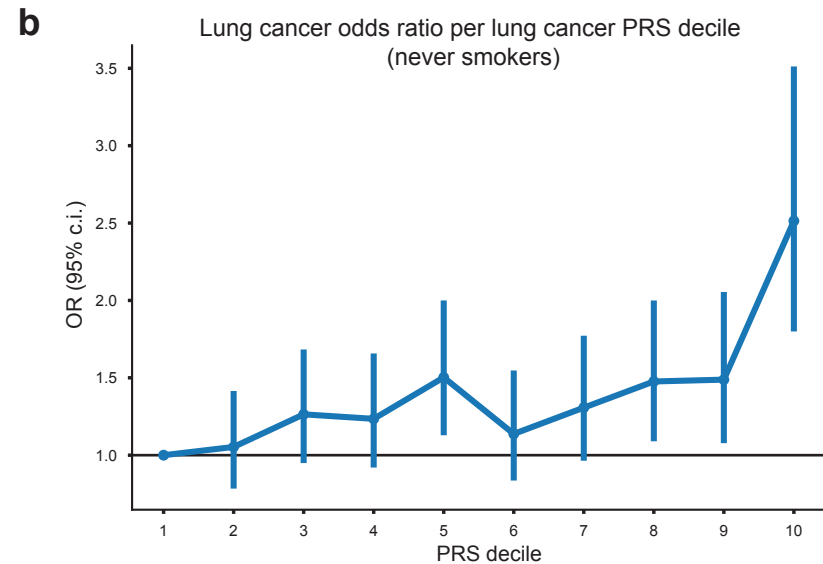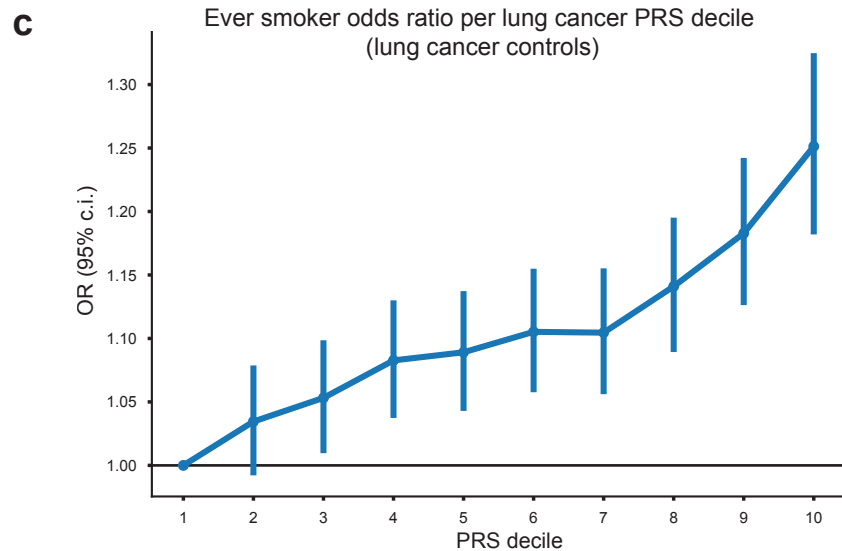

**Supplementary Fig. 7. Association of the lung cancer polygenic risk score (PRS) with lung cancer by smoking status. a)** Association of the lung cancer PRS with overall lung cancer risk. Error bars indicate 95% confidence interval. The risk of lung cancer reached an odds ratio (OR) of 2.51 (95% confidence interval: 1.80, 3.51) in the top decile. **b)** Association of the lung cancer PRS with lung cancer risk in never-smokers. Among never-smokers, lung cancer risk reached an OR of 2.67 (2.40, 2.98) in the top decile. **c)** Association of the lung cancer PRS with lung cancer risk in ever-smokers with no history of lung cancer. The top PRS decile was associated with an OR of 1.25 (1.18, 1.32).

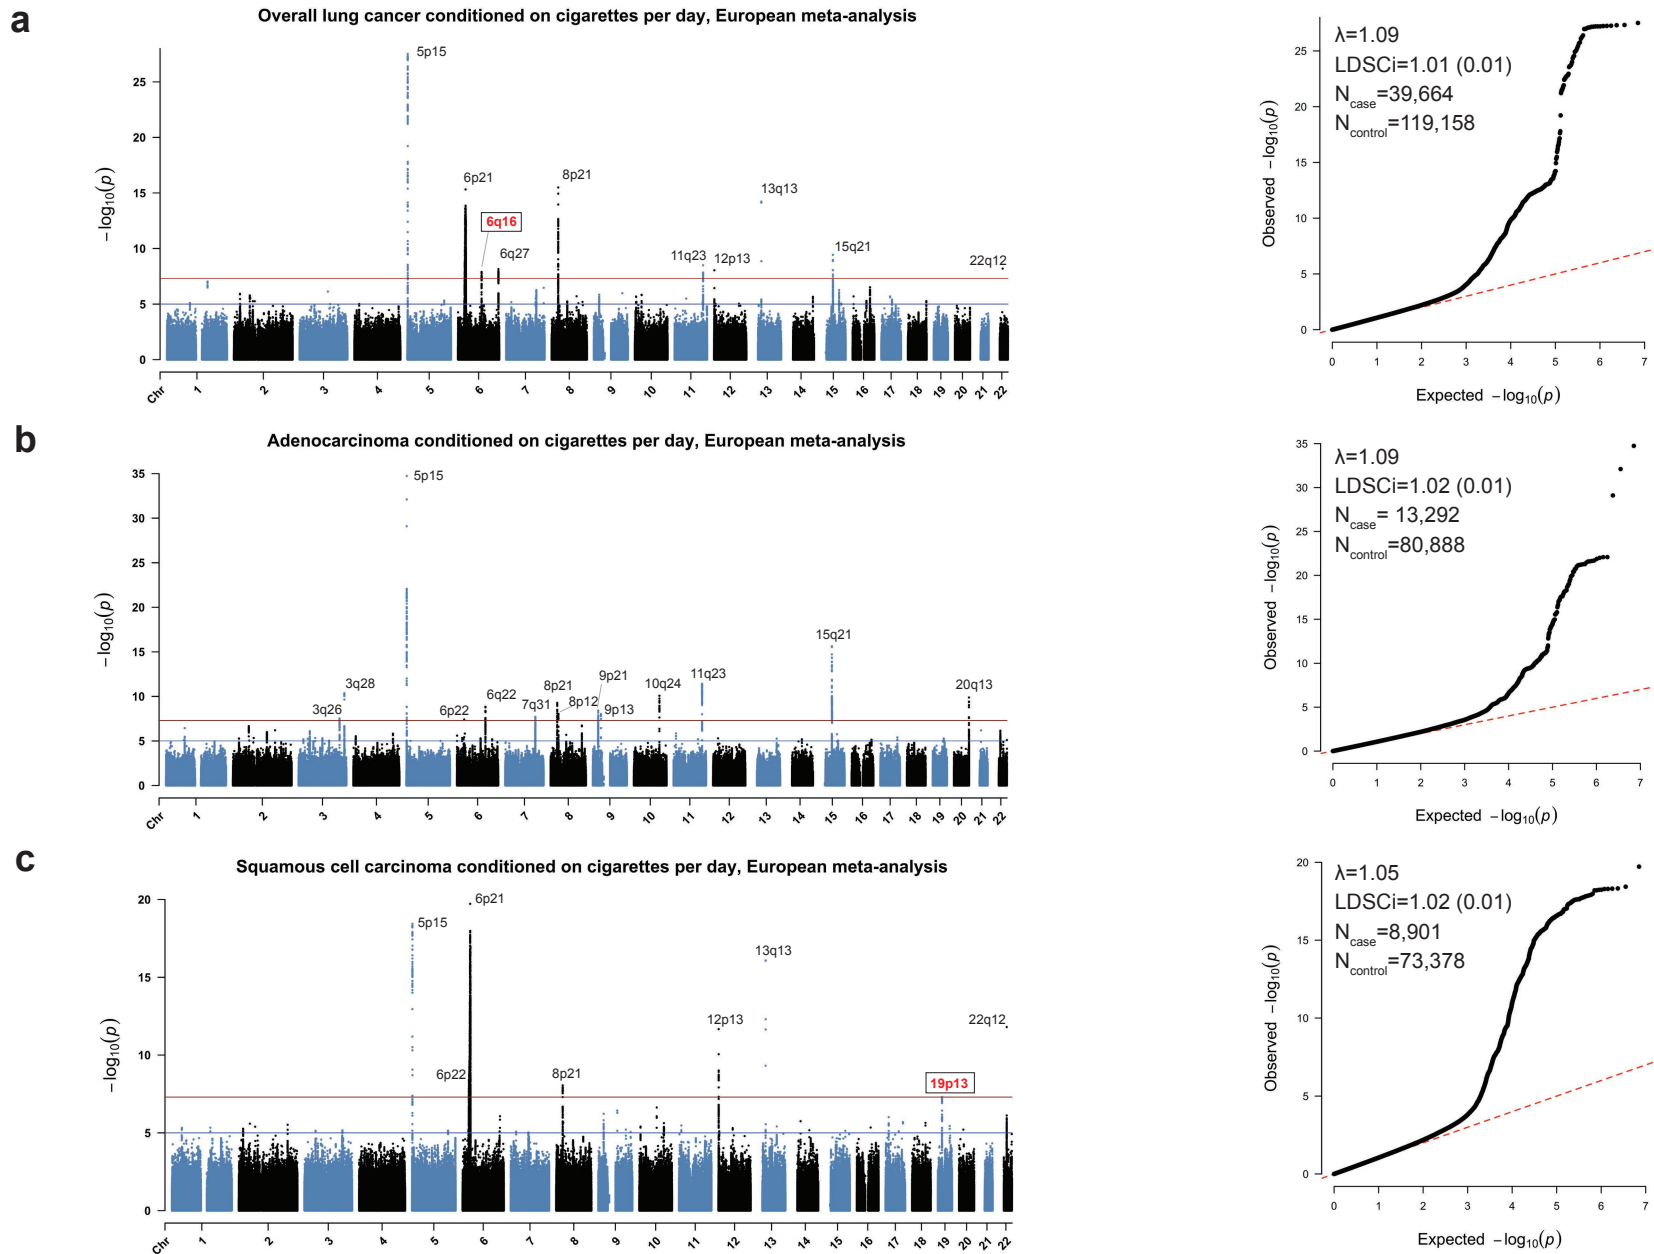

**Supplementary Fig. 8. Manhattan plots and quantile-quantile (QQ) plots for European meta-analyses conditioned on cigarettes per day<sup>2</sup>.** Manhattan and QQ plots for a) overall lung cancer conditioned on cigarettes per day; b) lung adenocarcinoma (LUAD) conditioned on cigarettes per day; and c) squamous cell lung carcinoma (LUSC) conditioned on cigarettes per day. Cytoband positions for significant loci are noted in each Manhattan plot; novel loci not identified in the European meta-analysis are in red; externally replicated novel loci are indicated by a box. Genomic control ( $\lambda$ ) values, LDSC intercepts, and sample sizes are inset in QQ plots.

**a**

**Overall lung cancer, rs1124241 (MMS22L; 6q16.1) : Novel and replicated**

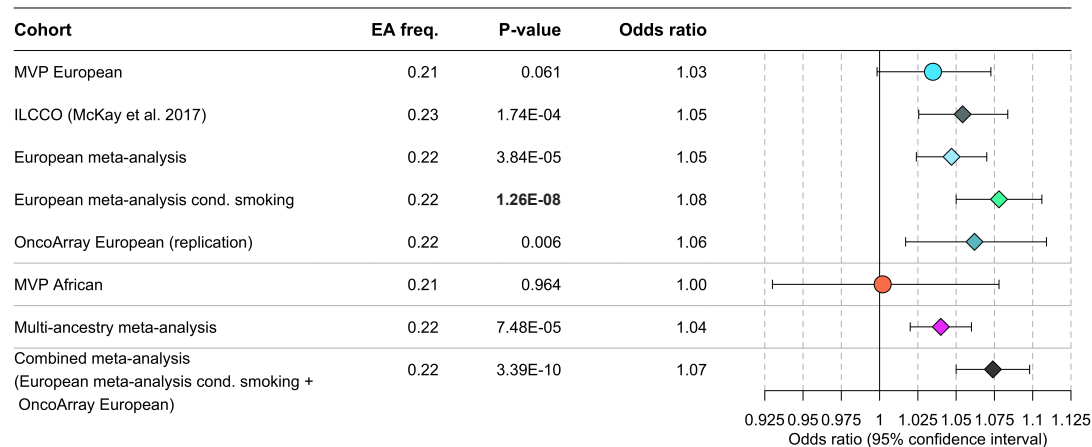

**Overall lung cancer conditioned on cigarettes per day, European meta-analysis**

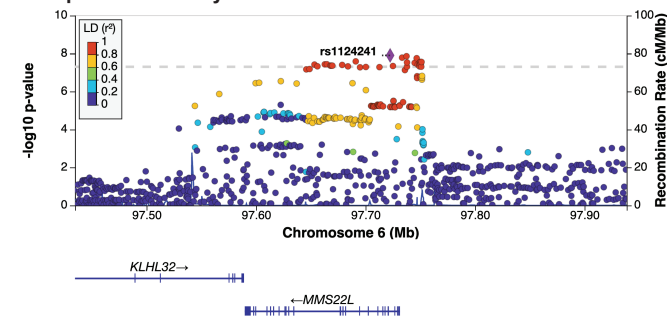

**b**

**Squamous cell lung carcinoma, rs61494113 (ABHD8; 19p13.11) : Novel and replicated**

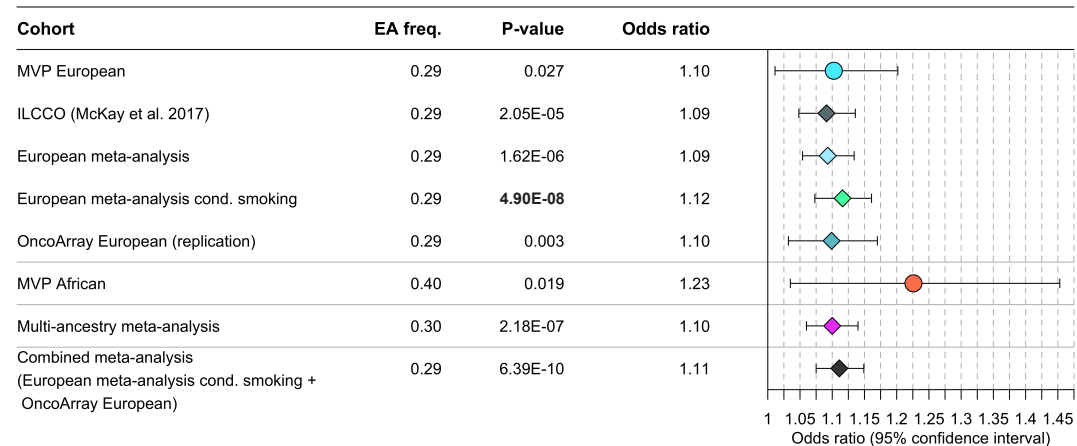

**Squamous cell lung cancer conditioned on cigarettes per day, European meta-analysis**

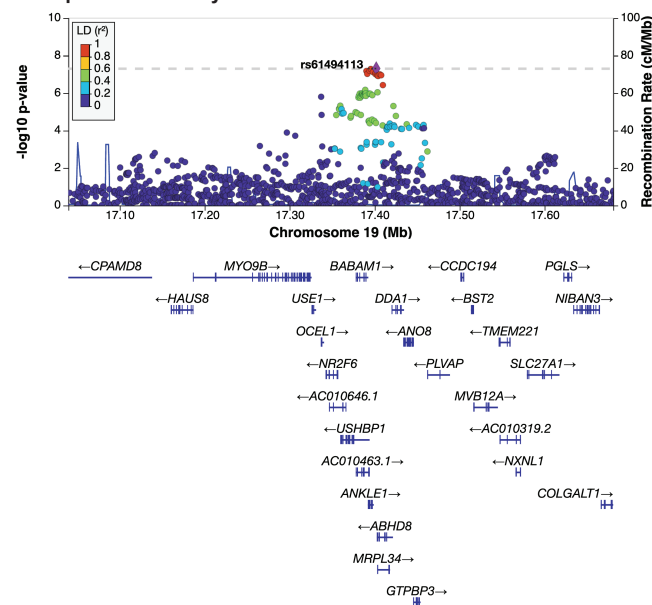

**Supplementary Fig. 9. Novel loci for overall lung cancer and squamous cell carcinoma conditioned on smoking. Locus zoom plots for the novel loci in the European meta-analysis conditioned on cigarettes per day: a) 6q16 in overall lung cancer and b) 19p13 in squamous cell lung cancer. Error bars indicate 95% confidence interval.**

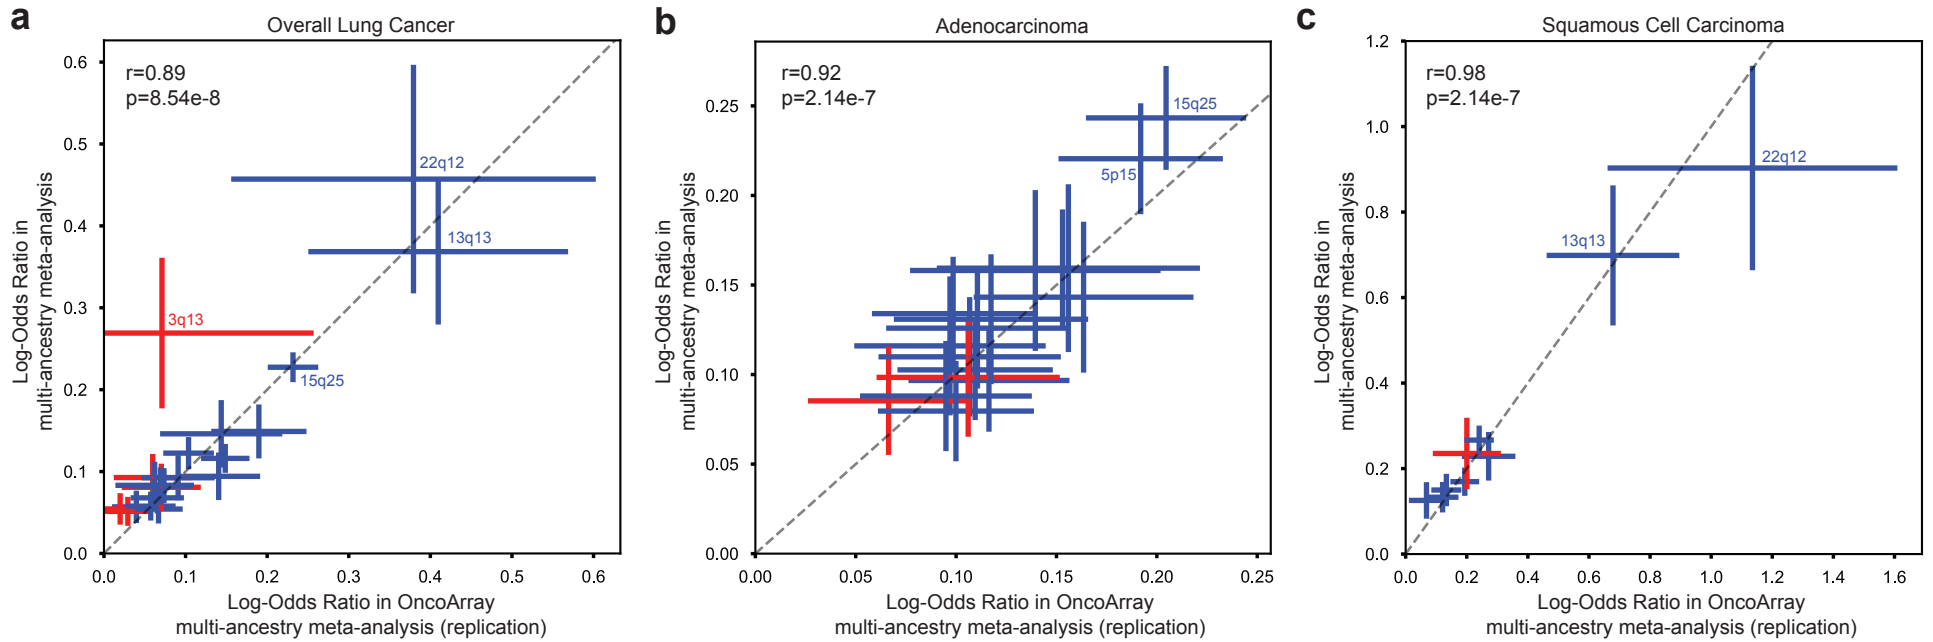

**Supplementary Fig. 10. Effect size concordance between our multi-ancestry meta-analysis and OncoArray replication cohort<sup>3</sup> multi-ancestry meta-analysis.** Comparing effect sizes from our multi-ancestry meta-analysis (European meta-analysis and Million Veteran Program African ancestry) and OncoArray multi-ancestry meta-analysis (European and African ancestries)<sup>3</sup> for genome-wide significant lead variants in **a**) overall lung cancer, **b**) lung adenocarcinoma, and **c**) squamous cell lung carcinoma. One-to-one concordance is shown as a dashed line. Known significant loci are in blue and novel significant loci from this study are in red. Error bars indicate 95% confidence interval.

## Supplementary References

1. McKay, J. D. *et al.* Large-scale association analysis identifies new lung cancer susceptibility loci and heterogeneity in genetic susceptibility across histological subtypes. *Nat. Genet.* **49**, 1126–1132 (2017).
2. Liu, M. *et al.* Association studies of up to 1.2 million individuals yield new insights into the genetic etiology of tobacco and alcohol use. *Nat. Genet.* **51**, 237–244 (2019).
3. Amos, C. I. *et al.* The OncoArray Consortium: A Network for Understanding the Genetic Architecture of Common Cancers. *Cancer Epidemiol. Biomarkers Prev.* **26**, 126–135 (2017).

# Million Veteran Program Full Acknowledgement

## MVP Executive Leadership

- Sumitra Muralidhar, Ph.D. (Director, MVP)  
US Department of Veterans Affairs, 810 Vermont Avenue NW, Washington, DC 20420
- J. Michael Gaziano, M.D., M.P.H.  
VA Boston Healthcare System, 150 S. Huntington Avenue, Boston, MA 02130
- Philip S. Tsao, Ph.D.  
VA Palo Alto Health Care System, 3801 Miranda Avenue, Palo Alto, CA 94304

## MVP Program Office

- Program Director - Sumitra Muralidhar, Ph.D.  
US Department of Veterans Affairs, 810 Vermont Avenue NW, Washington, DC 20420
- Associate Director, Scientific Programs - Jennifer Moser, Ph.D.  
US Department of Veterans Affairs, 810 Vermont Avenue NW, Washington, DC 20420
- Associate Director, Cohort Management & Public Relations - Jennifer E. Deen, B.S.  
US Department of Veterans Affairs, 810 Vermont Avenue NW, Washington, DC 20420

## MVP Operations

- Director of Regulatory Affairs – Lori Churby, B.S.  
VA Palo Alto Health Care System, 3801 Miranda Avenue, Palo Alto, CA 94304
- MVP Cohort Management Director – Stacey B. Whitbourne, Ph.D.  
VA Boston Healthcare System, 150 S. Huntington Avenue, Boston, MA 02130
- MVP Recruitment/Enrollment Director - Jessica V. Brewer, M.P.H.  
VA Boston Healthcare System, 150 S. Huntington Avenue, Boston, MA 02130
- Director, VA Central Biorepository, Boston – Mary T. Brophy M.D., M.P.H.  
VA Boston Healthcare System, 150 S. Huntington Avenue, Boston, MA 02130
- MVP Informatics, Boston – Shahpoor (Alex) Shayan, M.S.  
VA Boston Healthcare System, 150 S. Huntington Avenue, Boston, MA 02130
- Director, Center for Data and Computational Sciences (C-DACS) and Genomics and Data Validation Core – Saiju Pyarajan Ph.D.  
VA Boston Healthcare System, 150 S. Huntington Avenue, Boston, MA 02130
- Director, Phenomics Data Core – Kelly Cho, M.P.H, Ph.D.  
VA Boston Healthcare System, 150 S. Huntington Avenue, Boston, MA 02130

## Current MVP Local Site Investigators

- Atlanta VA Medical Center (Peter Wilson, M.D.)  
1670 Clairmont Road, Decatur, GA 30033
- Bay Pines VA Healthcare System (Rachel McArdle, Ph.D.)  
10,000 Bay Pines Blvd Bay Pines, FL 33744
- Birmingham VA Medical Center (Louis Dellitalia, M.D.)  
700 S. 19th Street, Birmingham AL 35233
- Central Western Massachusetts Healthcare System (Kristin Mattocks, Ph.D., M.P.H.)  
421 North Main Street, Leeds, MA 01053



- Cincinnati VA Medical Center (John Harley, M.D., Ph.D.)  
3200 Vine Street, Cincinnati, OH 45220
- Clement J. Zablocki VA Medical Center (Jeffrey Whittle, M.D., M.P.H.)  
5000 West National Avenue, Milwaukee, WI 53295
- VA Northeast Ohio Healthcare System (Frank Jacono, M.D.)  
10701 East Boulevard, Cleveland, OH 44106
- Durham VA Medical Center (Jean Beckham, Ph.D.)  
508 Fulton Street, Durham, NC 27705
- Edith Nourse Rogers Memorial Veterans Hospital (John Wells., Ph.D.)  
200 Springs Road, Bedford, MA 01730
- Edward Hines, Jr. VA Medical Center (Salvador Gutierrez, M.D.)  
5000 South 5th Avenue, Hines, IL 60141
- Veterans Health Care System of the Ozarks (Kathrina Alexander, M.D.)  
1100 North College Avenue, Fayetteville, AR 72703
- Fargo VA Health Care System (Kimberly Hammer, Ph.D.)  
2101 N. Elm, Fargo, ND 58102
- VA Health Care Upstate New York (James Norton, Ph.D.)  
113 Holland Avenue, Albany, NY 12208
- New Mexico VA Health Care System (Gerardo Villareal, M.D.)  
1501 San Pedro Drive, S.E. Albuquerque, NM 87108
- VA Boston Healthcare System (Scott Kinlay, M.B.B.S., Ph.D.)  
150 S. Huntington Avenue, Boston, MA 02130
- VA Western New York Healthcare System (Junzhe Xu, M.D.)  
3495 Bailey Avenue, Buffalo, NY 14215-1199
- Ralph H. Johnson VA Medical Center (Mark Hamner, M.D.)  
109 Bee Street, Mental Health Research, Charleston, SC 29401
- Columbia VA Health Care System (Roy Mathew, M.D.)  
6439 Garners Ferry Road, Columbia, SC 29209
- VA North Texas Health Care System (Sujata Bhushan, M.D.)  
4500 S. Lancaster Road, Dallas, TX 75216
- Hampton VA Medical Center (Pran Iruvanti, D.O., Ph.D.)  
100 Emancipation Drive, Hampton, VA 23667
- Richmond VA Medical Center (Michael Godschalk, M.D.)  
1201 Broad Rock Blvd., Richmond, VA 23249
- Iowa City VA Health Care System (Zuhair Ballas, M.D.)  
601 Highway 6 West, Iowa City, IA 52246-2208
- Eastern Oklahoma VA Health Care System (River Smith, Ph.D.)  
1011 Honor Heights Drive, Muskogee, OK 74401
- James A. Haley Veterans' Hospital (Stephen Mastorides, M.D.)  
13000 Bruce B. Downs Blvd, Tampa, FL 33612
- James H. Quillen VA Medical Center (Jonathan Moorman, M.D., Ph.D.)

- Corner of Lamont & Veterans Way, Mountain Home, TN 37684

  - John D. Dingell VA Medical Center (Saib Gappy, M.D.)  
4646 John R Street, Detroit, MI 48201
  - Louisville VA Medical Center (Jon Klein, M.D., Ph.D.)  
800 Zorn Avenue, Louisville, KY 40206
  - Manchester VA Medical Center (Nora Ratcliffe, M.D.)  
718 Smyth Road, Manchester, NH 03104
  - Miami VA Health Care System (Ana Palacio, M.D., M.P.H.)  
1201 NW 16th Street, 11 GRC, Miami FL 33125
  - Michael E. DeBakey VA Medical Center (Olaoluwa Okusaga, M.D.)  
2002 Holcombe Blvd, Houston, TX 77030
  - Minneapolis VA Health Care System (Maureen Murdoch, M.D., M.P.H.)  
One Veterans Drive, Minneapolis, MN 55417
  - N. FL/S. GA Veterans Health System (Peruvemba Sriram, M.D.)  
1601 SW Archer Road, Gainesville, FL 32608
  - Northport VA Medical Center (Shing Shing Yeh, Ph.D., M.D.)  
79 Middleville Road, Northport, NY 11768
  - Overton Brooks VA Medical Center (Neeraj Tandon, M.D.)  
510 East Stoner Ave, Shreveport, LA 71101
  - Philadelphia VA Medical Center (Darshana Jhala, M.D.)  
3900 Woodland Avenue, Philadelphia, PA 19104
  - Phoenix VA Health Care System (Samuel Aguayo, M.D.)  
650 E. Indian School Road, Phoenix, AZ 85012
  - Portland VA Medical Center (David Cohen, M.D.)  
3710 SW U.S. Veterans Hospital Road, Portland, OR 97239
  - Providence VA Medical Center (Satish Sharma, M.D.)  
830 Chalkstone Avenue, Providence, RI 02908
  - Richard Roudebush VA Medical Center (Suthat Liangpunsakul, M.D., M.P.H.)  
1481 West 10th Street, Indianapolis, IN 46202
  - Salem VA Medical Center (Kris Ann Oursler, M.D.)  
1970 Roanoke Blvd, Salem, VA 24153
  - San Francisco VA Health Care System (Mary Whooley, M.D.)  
4150 Clement Street, San Francisco, CA 94121
  - South Texas Veterans Health Care System (Sunil Ahuja, M.D.)  
7400 Merton Minter Boulevard, San Antonio, TX 78229
  - Southeast Louisiana Veterans Health Care System (Joseph Constans, Ph.D.)  
2400 Canal Street, New Orleans, LA 70119
  - Southern Arizona VA Health Care System (Paul Meyer, M.D., Ph.D.)  
3601 S 6th Avenue, Tucson, AZ 85723
  - Sioux Falls VA Health Care System (Jennifer Greco, M.D.)  
2501 W 22nd Street, Sioux Falls, SD 57105

- St. Louis VA Health Care System (Michael Rauchman, M.D.)  
915 North Grand Blvd, St. Louis, MO 63106
- Syracuse VA Medical Center (Richard Servatius, Ph.D.)  
800 Irving Avenue, Syracuse, NY 13210
- VA Eastern Kansas Health Care System (Melinda Gaddy, Ph.D.)  
4101 S 4th Street Trafficway, Leavenworth, KS 66048
- VA Greater Los Angeles Health Care System (Agnes Wallbom, M.D., M.S.)  
11301 Wilshire Blvd, Los Angeles, CA 90073
- VA Long Beach Healthcare System (Timothy Morgan, M.D.)  
5901 East 7th Street Long Beach, CA 90822
- VA Maine Healthcare System (Todd Stapley, D.O.)  
1 VA Center, Augusta, ME 04330
- VA New York Harbor Healthcare System (Peter Liang, M.D., M.P.H.)  
423 East 23rd Street, New York, NY 10010
- VA Pacific Islands Health Care System (Daryl Fujii, Ph.D.)  
459 Patterson Rd, Honolulu, HI 96819
- VA Palo Alto Health Care System (Philip Tsao, Ph.D.)  
3801 Miranda Avenue, Palo Alto, CA 94304-1290
- VA Pittsburgh Health Care System (Patrick Strollo, Jr., M.D.)  
University Drive, Pittsburgh, PA 15240
- VA Puget Sound Health Care System (Edward Boyko, M.D.)  
1660 S. Columbian Way, Seattle, WA 98108-1597
- VA Salt Lake City Health Care System (Jessica Walsh, M.D.)  
500 Foothill Drive, Salt Lake City, UT 84148
- VA San Diego Healthcare System (Samir Gupta, M.D., M.S.C.S.)  
3350 La Jolla Village Drive, San Diego, CA 92161
- VA Sierra Nevada Health Care System (Mostaqul Huq, Pharm.D., Ph.D.)  
975 Kirman Avenue, Reno, NV 89502
- VA Southern Nevada Healthcare System (Joseph Fayad, M.D.)  
6900 North Pecos Road, North Las Vegas, NV 89086
- VA Tennessee Valley Healthcare System (Adriana Hung, M.D., M.P.H.)  
1310 24th Avenue, South Nashville, TN 37212
- Washington DC VA Medical Center (Jack Lichy, M.D., Ph.D.)  
50 Irving St, Washington, D. C. 20422
- W.G. (Bill) Hefner VA Medical Center (Robin Hurley, M.D.)  
1601 Brenner Ave, Salisbury, NC 28144
- White River Junction VA Medical Center (Brooks Robey, M.D.)  
163 Veterans Drive, White River Junction, VT 05009
- William S. Middleton Memorial Veterans Hospital (Prakash Balasubramanian, M.D.)  
2500 Overlook Terrace, Madison, WI 53705

## International Lung Cancer Consortium OncoArray Consortium Acknowledgement for Manuscripts

| ILCCO OncoArray study name                                              | PI                          | Affiliation(s)                                                                                                                                                                                                                                                                            |
|-------------------------------------------------------------------------|-----------------------------|-------------------------------------------------------------------------------------------------------------------------------------------------------------------------------------------------------------------------------------------------------------------------------------------|
| ATBC                                                                    | Demetrios Albanes           | National Cancer Institute                                                                                                                                                                                                                                                                 |
| Canadian screening study                                                | Stephen Lam                 | British Columbia Cancer Agency                                                                                                                                                                                                                                                            |
| CAPUA STUDY                                                             | Adonina Tardon              | IUOPA. University of Oviedo and CIBERESP. Spain.                                                                                                                                                                                                                                          |
| CARET                                                                   | Chu Chen                    | Fred Hutchinson Cancer Research CenterPublic Health Sciences                                                                                                                                                                                                                              |
| Copenhagen                                                              | Stig E. Bojesen             | Copenhagen General Population Study, Herlev and Gentofte Hospital, Copenhagen, Denmark; Department of Clinical Biochemistry, Herlev and Gentofte Hospital, Copenhagen University Hospital, Denmark; Faculty of Health and Medical Sciences, University of Copenhagen, Copenhagen, Denmark |
| EAGLE                                                                   | Maria Teresa Landi          | National Cancer Institute                                                                                                                                                                                                                                                                 |
| EPIC: European Prospective Investigation into Cancer and Nutrition      | Mattias Johansson           | International Agency for Research on Cancer                                                                                                                                                                                                                                               |
| German Lung Cancer Study - DKFZ                                         | Angela Risch                | University of Salzburg and Cancer Cluster Salzburg; Translational Lung Research Center Heidelberg (TLRC-H), Member of the German Center for Lung Research (DZL); German Cancer Research Center (DKFZ)                                                                                     |
| German Lung Cancer Study -LUCY                                          | Heike Bickeböller           | University Medical Center Goettingen                                                                                                                                                                                                                                                      |
| German Lung Cancer Study - LUCY                                         | H-Erich Wichmann            | Institute of Medical Informatics, Biometry and Epidemiology, Chair of Epidemiology, Ludwig Maximilians University, Munich, Germany; Helmholtz Center Munich, Institute of Epidemiology 2, Germany; Institute of Medical Statistics and Epidemiology, Technical University Munich, Germany |
| Harvard Lung Cancer Study                                               | David Christiani            | Harvard School of Public Health                                                                                                                                                                                                                                                           |
| Israel                                                                  | Gadi Rennert                | Carmel Medical Center                                                                                                                                                                                                                                                                     |
| Kentucky (LCRI-DOD)                                                     | Susanne Arnold              | Markey Cancer Center                                                                                                                                                                                                                                                                      |
| L2-IARC                                                                 | Paul Brennan<br>James McKay | International Agency for Research on Cancer                                                                                                                                                                                                                                               |
| Liverpool Lung Project                                                  | John K. Field               | Liverpool University                                                                                                                                                                                                                                                                      |
| MDACC                                                                   | Sanjay S. Shete             | The University of Texas MD Anderson Cancer Center                                                                                                                                                                                                                                         |
| MEC                                                                     | Loic Le Marchand            | Epidemiology Program, University of Hawaii Cancer Center                                                                                                                                                                                                                                  |
| MDCS: The Malmö Diet and Cancer Study                                   | Olle Melander               | Department of Clinical Sciences Malmö, Lund University, Sweden; Department of Internal Medicine, Skåne University Hospital, Malmö, Sweden                                                                                                                                                 |
| MDCS: The Malmö Diet and Cancer Study                                   | Hans Brunnström             | Lund University, Laboratory Medicine Region Skåne, Department of Clinical Sciences Lund, Pathology, Lund, Sweden                                                                                                                                                                          |
| MSH-PMH, Canadian Screening studies                                     | Geoffrey Liu                | Princess Margaret Cancer Center                                                                                                                                                                                                                                                           |
| MSH-PMH                                                                 | Rayjean J. Hung             | Lunenfeld-Tanenbuaum Research Institute, Sinai Health System                                                                                                                                                                                                                              |
| NELCS                                                                   | Angeline Andrew             | Norris Cotton Cancer Center                                                                                                                                                                                                                                                               |
| Nijmegen                                                                | Lambertus A. Kiemeneij      | Radboud university medical center                                                                                                                                                                                                                                                         |
| Norway                                                                  | Shan Zienolddiny-Narui      | National Institute of Occupational Health                                                                                                                                                                                                                                                 |
| NSHDS: Northern Sweden Health and Disease Study                         | Kjell Grankvist             | Department of Medical Biosciences, Umeå University, 90185 Umeå, Sweden                                                                                                                                                                                                                    |
| NSHDS: Northern Sweden Health and Disease Study                         | Mikael Johansson            | Department of Radiation Sciences, Umeå University, 90185 Umeå, Sweden                                                                                                                                                                                                                     |
| PLCO                                                                    | Neil Caporaso               | National Cancer Institute                                                                                                                                                                                                                                                                 |
| ReSoLucent                                                              | Angie Cox                   | University Of Sheffield                                                                                                                                                                                                                                                                   |
| Tampa Lung Cancer Study                                                 | Philip Lazarus              | Washington State University College of Pharmacy                                                                                                                                                                                                                                           |
| Total Lung Cancer (TLC): Molecular Epidemiology of Lung Cancer Survival | Matthew B. Schabath         | Department of Cancer Epidemiology, H. Lee Moffitt Cancer Center and Research Institute                                                                                                                                                                                                    |
| Vanderbilt Lung Cancer Study - BioVU                                    | Melinda C. Aldrich          | Department of Thoracic Surgery, Division of Epidemiology, Vanderbilt University Medical Center                                                                                                                                                                                            |
| OncoArray coordination                                                  | Christopher I. Amos         | Institute for Clinical and Translational Research, Baylor Medical College                                                                                                                                                                                                                 |
| OncoArray coordination                                                  | Rayjean J. Hung             | Lunenfeld-Tanenbuaum Research Institute, Sinai Health System                                                                                                                                                                                                                              |
