# Supplementary material for: Multi-ancestry GWAS meta-analyses of lung cancer reveal susceptibility loci and elucidate smoking-independent genetic risk
Source: PubMed Central journal article supplement — Nat Commun. 2024 Oct 4;15:8629. doi: 10.1038/s41467-024-52129-4 (PMC11452618; doi:10.1038/s41467-024-52129-4), 2024-10-04
Supplement: 41467_2024_52129_MOESM3_ESM.pdf [file 41467_2024_52129_MOESM3_ESM.pdf]

## **Description of Additional Supplementary Files**

**File Name: Supplementary Data 1.**

Description: Lung cancer GWAS participant characteristics. Participant details for lung cancer cases and controls in Million Veteran Program (MVP), International Lung Cancer Consortium (ILCCO; McKay et al. 2017), and OncoArray (external replication) cohorts.

**File Name: Supplementary Data 2.**

Description: Genome-wide significant conditionally independent associations for overall lung cancer in European (EA) meta-analysis.

**File Name: Supplementary Data 3.**

Description: Genome-wide significant conditionally independent associations for lung adenocarcinoma in European (EA) meta-analysis.

**File Name: Supplementary Data 4.**

Description: Genome-wide significant conditionally independent associations for squamous cell lung carcinoma in European (EA) meta-analysis.

**File Name: Supplementary Data 5.**

Description: Fine mapping Million Veteran Program European lung cancer loci.

**File Name: Supplementary Data 6.**

Description: Fine mapping Million Veteran Program African American (MVP AA) genome-wide significant loci for overall lung cancer.

**File Name: Supplementary Data 7.**

Description: Genome-wide significant loci for overall lung cancer in multi-ancestry meta-analysis.

**File Name: Supplementary Data 8.**

Description: Genome-wide significant loci for lung adenocarcinoma in multi-ancestry meta-analysis.

**File Name: Supplementary Data 9.**

Description: Genome-wide significant loci for squamous cell lung carcinoma in multi-ancestry meta-analysis.

**File Name: Supplementary Data 10.**

Description: Novel genome-wide significant loci associated with lung cancer risk.

**File Name: Supplementary Data 11.**

Description: Genetic correlation results for lung cancer and subtypes with cigarette smoking traits.

**File Name: Supplementary Data 12.**

Description: Heritability results for lung cancer subtypes in European ancestry (EA) meta-analysis.

**File Name: Supplementary Data 13.**

Description: European meta-analysis overall lung cancer associations conditioned on cigarettes per day. Multi-trait-based conditional and joint analysis (mtCOJO) conditioning GWAS results on cigarettes per day from Liu et al.

**File Name: Supplementary Data 14.**

Description: European meta-analysis (EA) adenocarcinoma associations conditioned on cigarettes per day.

**File Name: Supplementary Data 15.**

Description: European meta-analysis (EA) squamous cell carcinoma associations conditioned on cigarettes per day.

**File Name: Supplementary Data 16.**

Description: Odds ratio (OR) for polygenic risk scores (PRS) of lung cancer, stratified by smoking status.

**File Name: Supplementary Data 17.**

Description: Replication summary of significant signals, stratified by lung cancer subtype and novelty.

**File Name: Supplementary Data 18.**

Description: Replication of lung cancer multi-ancestry meta-analysis.

**File Name: Supplementary Data 19.**

Description: Combined meta-analysis of discovery and replication cohorts for novel loci.

**File Name: Supplementary Data 20.**

Description: Discovery lung cancer signals in previously published GWAS.

**File Name: Supplementary Data 21.**

Description: coloc-SuSiE results.

**File Name: Supplementary Data 22.**

Description: Phenome-wide associations with polygenic risk score of lung cancer.

**File Name: Supplementary Data 23.**

Description: Phenome-wide associations with polygenic risk score of lung cancer conditioned on cigarettes per day.

**File Name: Supplementary Data 24.**

Description: Hardy-Weinberg equilibrium exact test results.
